# Supplementary material for: A Model of Yeast Cell-Cycle Regulation Based on a Standard Component Modeling Strategy for Protein Regulatory Networks
Source: PLoS One. 2016 May 17;11(5):e0153738. doi: 10.1371/journal.pone.0153738 (PMC4871373; doi:10.1371/journal.pone.0153738)
Supplement: S4 Table — (DOCX) [file pone.0153738.s014.docx]

**S4 Table. Parameter changes and initial conditions used to simulate mutant alleles.**

For mutant strains that carry combinations of these alleles, we used combinations of these parameter changes.

| Mutant allele | Parameter change(s) |
| --- | --- |
| * |  |
|  |  |
|  |  |
|  |  |
|  |  |
|  |  |
|  |  |
|  |  |
|  |  |
|  |  |
|  |  |
|  |  |
|  |  |
|  |  |
|  |  |
|  |  |
|  |  |
|  |  |
|  |  |
|  |  |
|  |  |
|  |  |
|  |  |
| ** |  |
|  |  |
|  |  |
|  |  |
|  |  |
|  |  |
| *CDH1* constitutively active |  |
|  |  |
|  |  |
|  |  |
|  |  |
|  |  |
|  |  |
|  | 2 copies of *GAL-CLB2* |
|  |  |
|  |  |
|  |  |
|  |  |
|  |  |
|  |  |
|  |  |
|  |  |
|  |  |
|  |  |
|  |  |
|  |  |
| *** |  |
|  |  |
|  |  |
| *** |  |
|  |  |
|  |  |
|  |  |
|  |  |

* In galactose medium, *mdt* =150 min, and mother:daughter size ratio at birth = 61:39.

** Since the ratio between Sic1 and Cdc6 is 1:2, the synthesis rate of CKI in cells should drop to 2/3. However, we reduce the synthesis rate of CKI in this mutant to ~1/8 to account for the fact that Cdc6 does not bind to Clb5 and Clb2 as strongly as Sic1 does.

*** We set the parameter *ρ*14,net1 < 1 to reproduce the weaker interaction between Net1 and Cdc14 in strains carrying these alleles.
